# Supplementary material for: Dynamic nanoscale architecture of synaptic vesicle fusion in mouse hippocampal neurons
Source: Springer Nature journal article supplement (doi:10.1038/s41467-025-67291-6), 2025-12-13
Supplement: MOESM2 [file 41467_2025_67291_MOESM2_ESM.pdf › 41467_2025_67291_MOESM2_ESM.pdf]

### **The Description of Additional Supplementary Files**

**Supplementary Video 1:** Tomogram of a stimulated synapse with an open fusion pore.
